# Supplementary material for: Knockdown of GABAA alpha3 subunits on thalamic reticular neurons enhances deep sleep in mice
Source: PubMed Central journal article supplement (PMC9042958; doi:10.1038/s41467-022-29852-x), 2022-04-26
Supplement: 41467_2022_29852_MOESM1_ESM.pdf [file 41467_2022_29852_MOESM1_ESM.pdf]

Supplementary information of:

Knockdown of GABAA alpha3 subunits on thalamic reticular neurons  
enhances deep sleep in mice

5 Authors: David S. Uygun<sup>1</sup>, Chun Yang<sup>1</sup>, Elena R. Tilli<sup>2</sup>, Fumi Katsuki<sup>1</sup>, Erik L. Hodges<sup>1</sup>,  
James T. McKenna<sup>1</sup>, James M. McNally<sup>1</sup>, Ritchie E. Brown<sup>1</sup>†, Radhika Basheer<sup>1\*</sup>†.

Affiliations:

<sup>1</sup>VA Boston Healthcare System and Harvard Medical School, Dept. of Psychiatry, West  
Roxbury, MA 02132, USA.

<sup>2</sup>Stonehill College, Department of Psychology, Easton, MA 02357, USA

10 \*Correspondence to: radhika\_basheer@hms.harvard.edu

† These authors jointly supervised this work

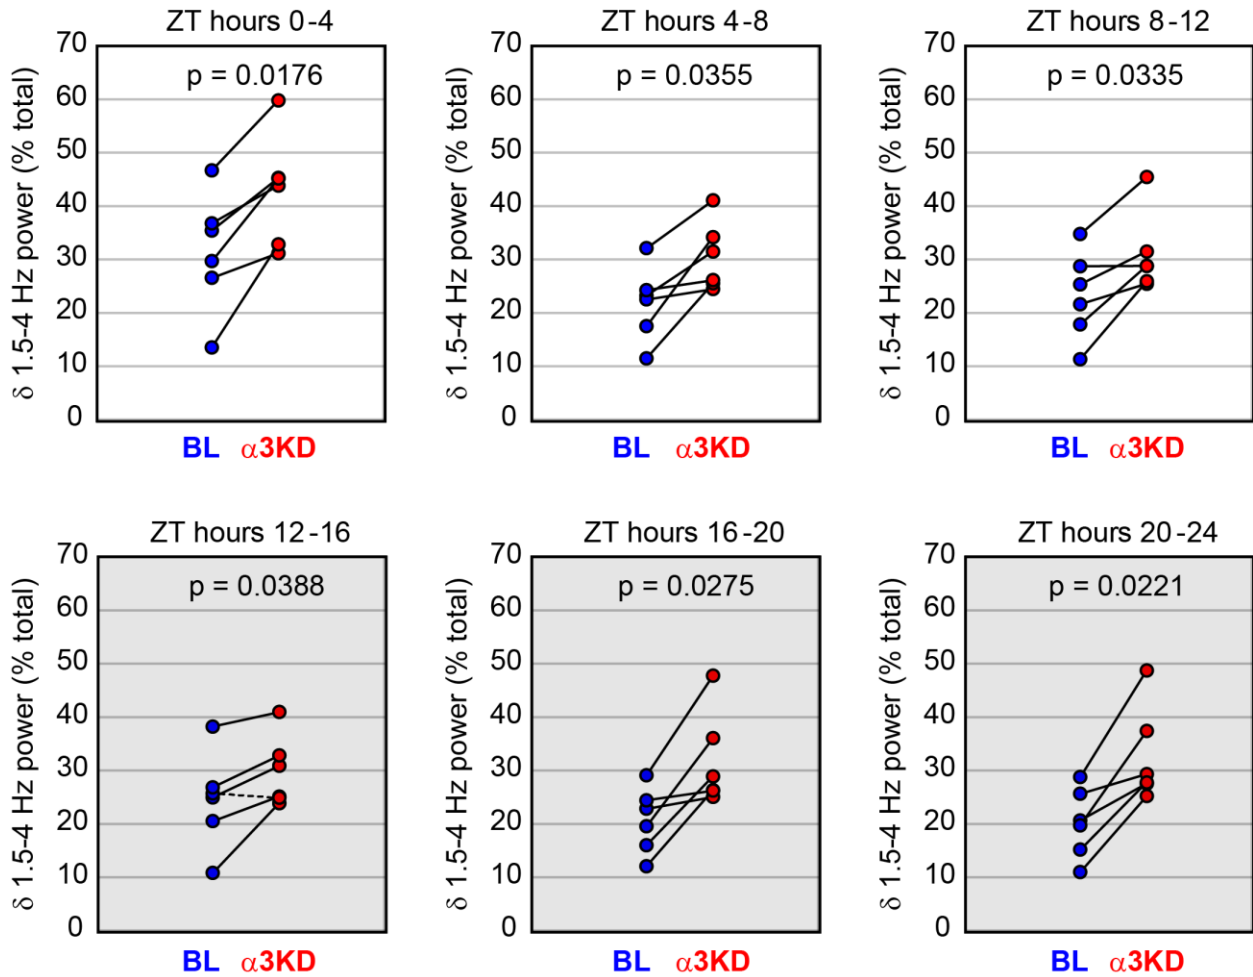

Supplementary Fig. 1.  $\alpha$ 3KD in PV+TRN neurons consistently increased NREM delta ( $\delta$ , 1.5-4 Hz) power, with the effect being most prominent in the first 4 hours of the light period. Compared with their baseline (BL; blue) recordings, each  $\alpha$ 3KD (red) mouse had higher NREM delta power in every four-hour zeitgeber time (ZT) period, except in one mouse (dashed line) in the first four hours of the dark period (grey) when mice are mostly awake. Significance was determined using two-tailed paired t-tests with Hommel corrected p-values to account for family-wise error rate. N = 6.

15

20

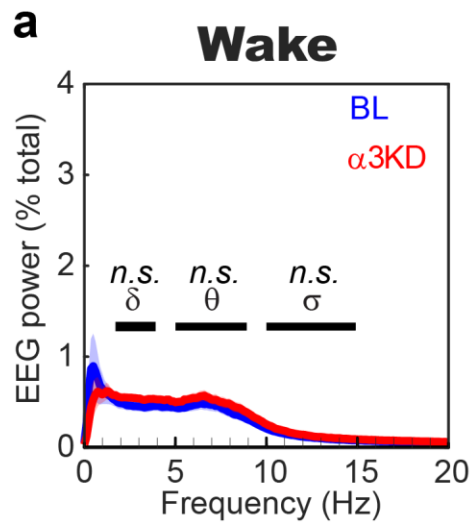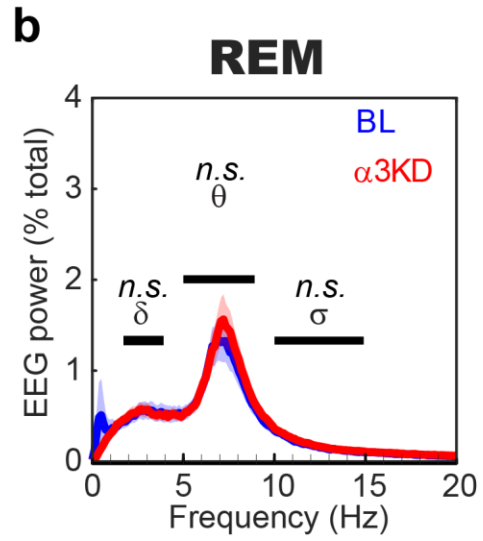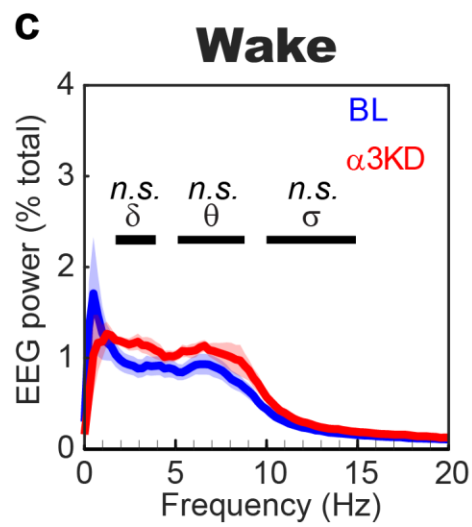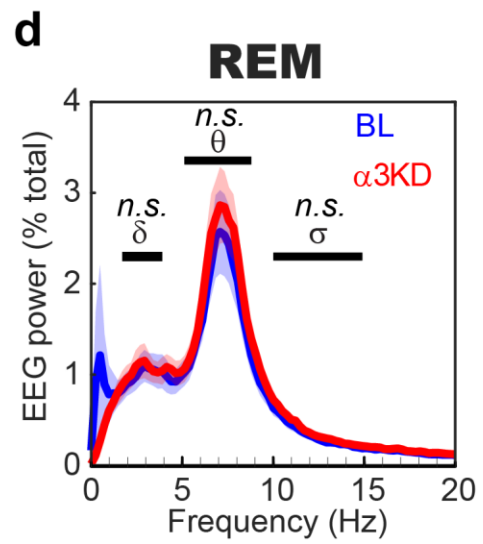

Supplementary Fig. 2.  $\alpha$ 3KD in PV+TRN neurons did not alter the electroencephalographic (EEG) spectral profile of wakefulness or REM sleep. A. During the whole 12-hours light period, compared with their baseline (BL; blue) levels from before the  $\alpha$ 3KD was initiated,  $\alpha$ 3KD (red) mice (N=6) had the same amounts of delta ( $\delta$ , 1.5-4 Hz) power, theta ( $\theta$ , 5-9 Hz) power and sigma ( $\sigma$ , 10-15 Hz) power in wakefulness. Thick lines indicate mean; envelopes indicate SEM. b. Compared with their baseline (BL) levels (blue) from before the  $\alpha$ 3KD was initiated,  $\alpha$ 3KD (red) mice had the same amounts of delta ( $\delta$ ) power, theta ( $\theta$ ) power and sigma ( $\sigma$ ) power in REM sleep during the light period. Thick lines indicate mean; envelopes indicate SEM. c. during the first four hours of the light period, compared with their baseline (BL) levels (blue) from before the  $\alpha$ 3KD was initiated,  $\alpha$ 3KD (red) mice had the same amounts of delta ( $\delta$ ) power, theta ( $\theta$ ) power and sigma ( $\sigma$ ) power in wakefulness. Thick lines indicate mean; envelopes indicate SEM. d. Compared with their baseline (BL) levels (blue) from before the  $\alpha$ 3KD was initiated,  $\alpha$ 3KD (red) mice had the same amounts of delta ( $\delta$ ) power, theta ( $\theta$ ) power and sigma ( $\sigma$ ) power in REM sleep during the first four hours of the light period. Significance was determined using two-tailed paired t-tests. Thick lines indicate mean; envelopes indicate SEM. n.s. indicates not significant.

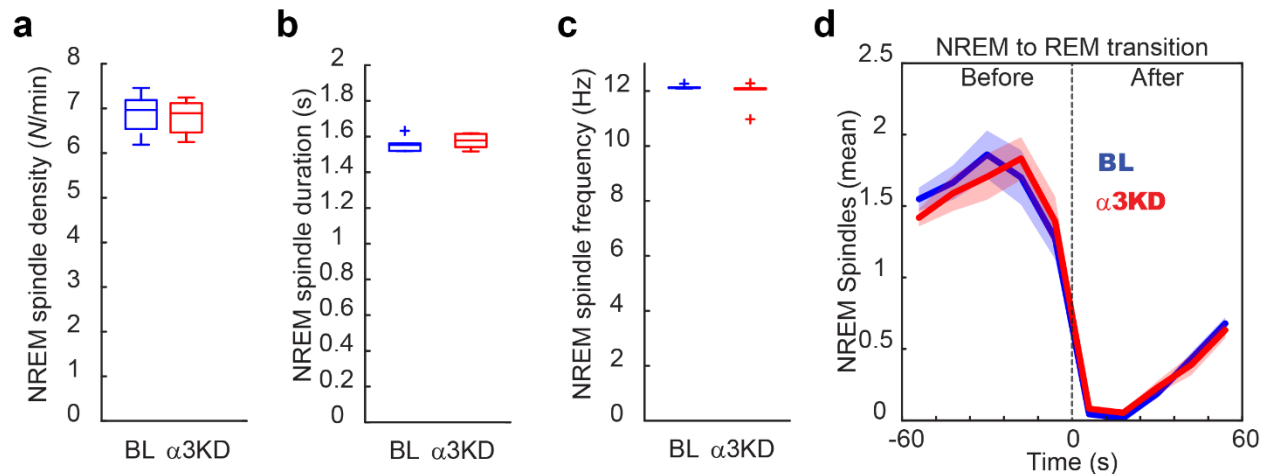

45 Supplementary Fig. 3. Knockdown of  $\alpha 3$  containing GABA<sub>A</sub>Rs in PV+ TRN neurons did not affect sleep spindle activity. a. Compared to baseline (BL; blue),  $\alpha 3$ KD (red; N = 6) did not change the density of NREM spindles, as measured by the number of spindles per minute of NREM ( $t(5) = 1.27, p = 0.26$ ). b.  $\alpha 3$ KD (N = 6) did not change the duration of NREM spindles ( $t(5) = -1.66, p = 0.16$ ). c.  $\alpha 3$ KD (N=6) did not change the frequency of NREM spindles ( $t(5) = 1.11, p = 0.32$ ). d.  $\alpha 3$ KD did not change the number of NREM spindles within the period of NREM before a transition to REM, when sigma power and spindles surge in mice. Significance was determined using two-tailed paired t-tests. Thick lines indicate mean; envelopes indicate SEM. Box plots: center lines represent median values, 75<sup>th</sup> percentiles are box tops and 25<sup>th</sup> percentiles are box bottoms. + symbols represent outliers defined as > 1.5x the interquartile range away from box tops or bottoms.

50

55

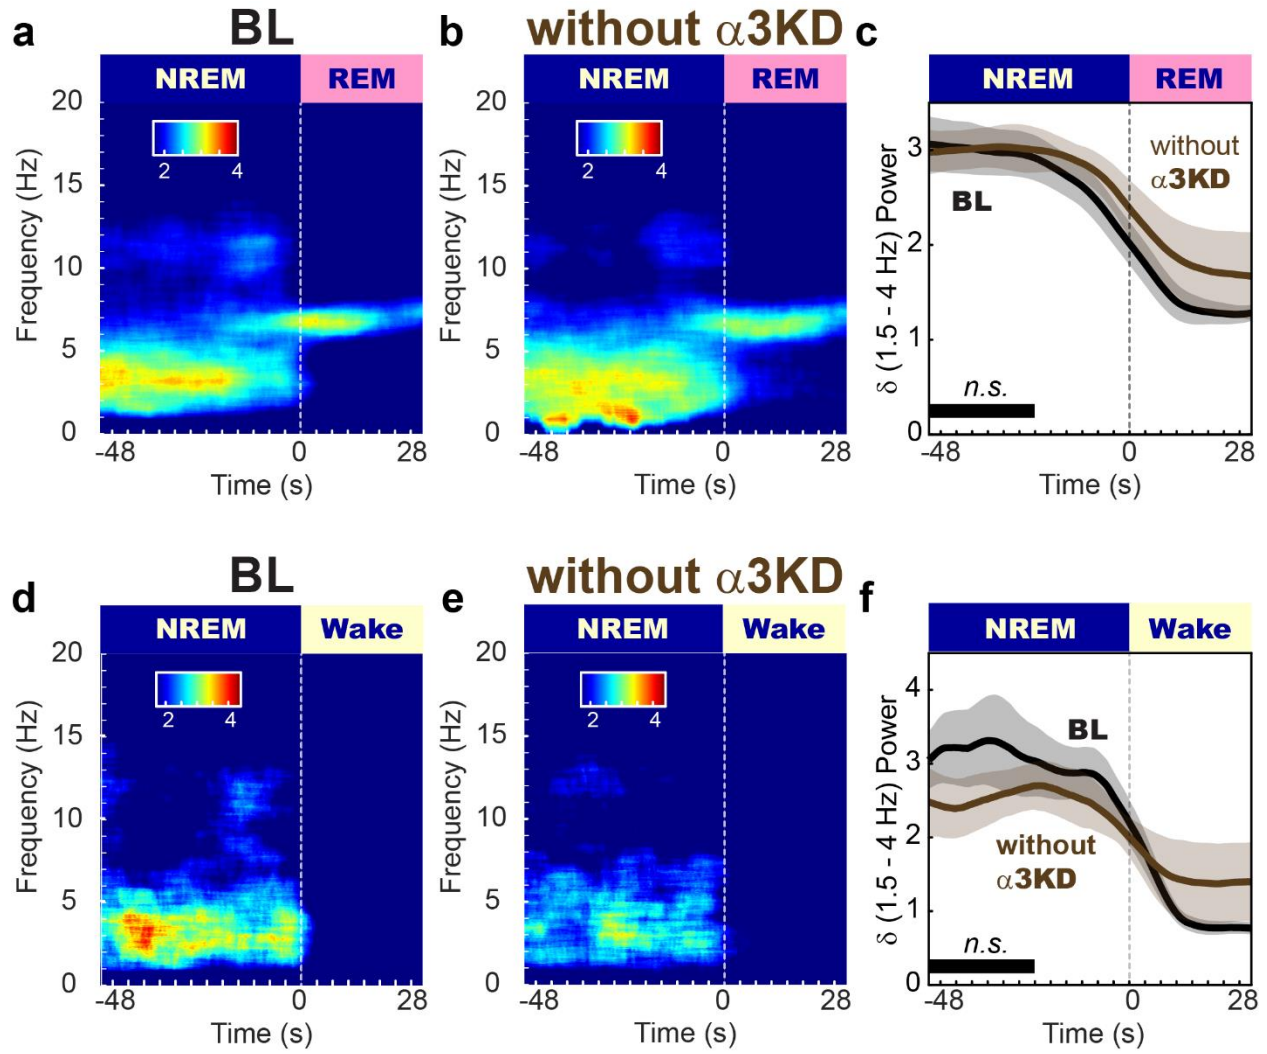

Supplementary Fig. 4. The control cohort with insufficient transduction of PV+TRN neurons, displayed no changes to NREM or wake time, or delta power in any states, including transitions from NREM to REM. a. Baseline (BL) time-frequency power dynamics reveals high delta power in non-rapid eye movement sleep (NREM) leading to a transition to rapid eye movement sleep (REM). b. In the control cohort with no or low transduction of PV+TRN neurons (N = 4), the delta power in NREM before a transition to REM was the same as in their BL records. c. Compared with baseline (black), the control cohort with insufficient transduction of PV+TRN neurons (brown) mice had unaltered delta ( $\delta$ , 1.5-4 Hz) power in the NREM before a transition to REM ( $t(3) = 0.03$ ,  $p = 0.49$ ). Significance was tested using a one-tailed paired t-test. Thick lines indicate mean; envelopes indicate SEM. d. BL time-frequency power dynamics reveals delta power in NREM leading to a transition to wake. e. the control cohort with insufficient transduction of PV+TRN neurons did not have increased delta power in NREM before a transition to wake. f. Compared with baseline (black), the control cohort which lacked transduction of PV+TRN neurons (brown) mice had unchanged delta power in the NREM preceding a transition to wake ( $t(3) = -1.68$ ,  $p = 0.9$ ). Significance was tested using a one-tailed paired t-test. Thick lines indicate mean; envelopes indicate SEM. Data from whole 12 period of light. N = 4. Color scales represent normalized power (power at time/power from wakefulness).

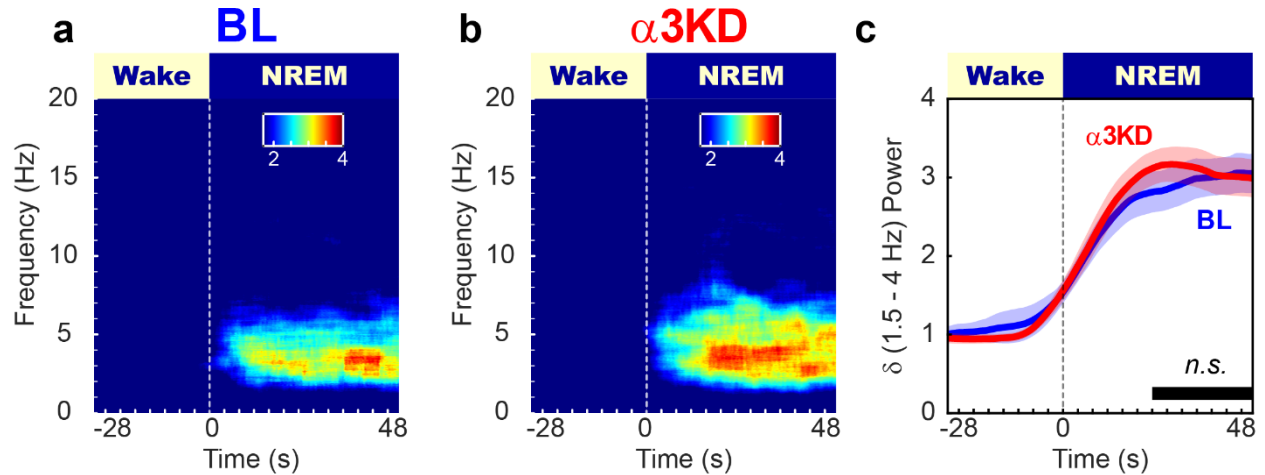

80 Supplementary Fig. 5.  $\alpha 3\text{KD}$  in PV+TRN neurons did not increase NREM delta power at  
wake to NREM transitions. a. Baseline (BL; blue) time-frequency power dynamics  
presents delta ( $\delta$ , 1.5-4 Hz) power in non-rapid eye movement sleep (NREM) following  
a transition from wakefulness. b. After  $\alpha 3\text{KD}$  (red), the delta power in NREM after a  
85 transition from wakefulness appeared similar. c. Compared with their BL levels (blue),  
 $\alpha 3\text{KD}$  (red) mice had similar amounts of delta power in the NREM following a transition  
from wakefulness ( $t(5) = 0.67, p = 0.27$ ). Data from whole 12 period of light. N = 6.  
Thick lines indicate mean; envelopes indicate SEM. Color scales represent normalized  
power (power at time/power from wakefulness). Thick lines indicate mean; envelopes  
90 indicate SEM. Color scales represent normalized power (power at time/power from  
wakefulness).



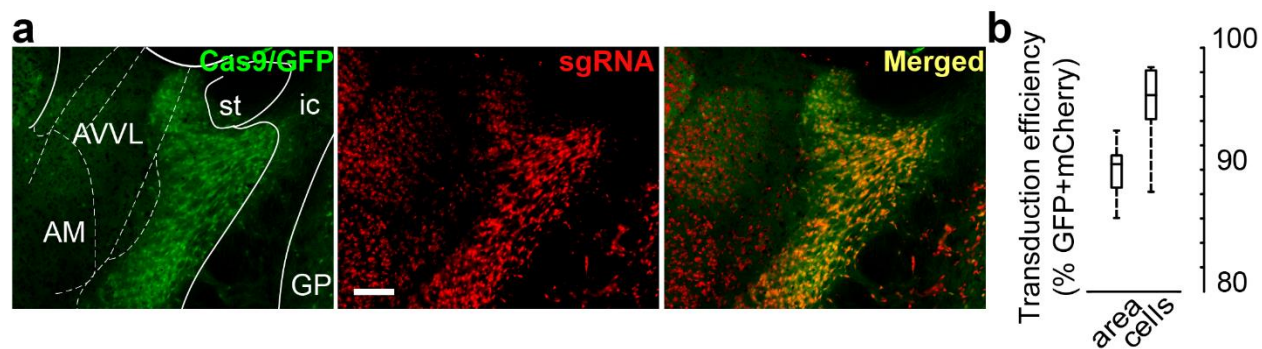

Supplementary Fig. 6. Successful targeting of PV+ TRN neurons by the control vector 'sgRNA- $\alpha$ 1-mCherry' was validated by histology. a. GFP indicates rich Cas9 expression within the TRN region (green), mCherry reveals widespread transduction of the TRN region by the AAV vector delivering  $\alpha$ 1 targeting sgRNAs (red) with many of the cells in the area co-expressing both markers (merged; yellow). Scale bar = 200  $\mu$ m. b. Percentages of target cells and target area that co-express markers reveal widespread delivery of  $\alpha$ 1 targeting sgRNAs to target cells in the mice used for *in vivo* control experiments. Box plots: center lines represent median values, 75<sup>th</sup> percentiles are box tops and 25<sup>th</sup> percentiles are box bottoms. + symbols represent outliers defined as > 1.5x the interquartile range away from box tops or bottoms. N = 7. [Adapted from Franklin and Paxinos<sup>59</sup>, with permission from Elsevier].

95

100

105

| <i>Frequency band</i>       | <i>Zeitgeber period</i> | 0-4    | 4-8    | 8-12   | 12-16  | 16-20  | 20-24  | 0-12   | 12-24 |
|-----------------------------|-------------------------|--------|--------|--------|--------|--------|--------|--------|-------|
| <u>0.5-1.5 Hz</u>           | BL mean                 | 8.8    | 8.5    | 8.2    | 9.4    | 8.8    | 9.1    | 7.7    | 8.8   |
|                             | BL SEM                  | 1.7    | 0.9    | 1.0    | 1.8    | 1.0    | 1.5    | 1.5    | 1.8   |
|                             | KD mean                 | 11.1   | 8.9    | 8.9    | 8.9    | 9.2    | 9.2    | 9.1    | 7.5   |
|                             | KD SEM                  | 0.9    | 0.6    | 0.8    | 0.6    | 0.9    | 0.8    | 0.4    | 0.6   |
|                             | P value                 | 0.1550 | 0.6812 | 0.5608 | 0.8100 | 0.7392 | 0.9273 | 0.4363 | 0.448 |
| <u>0-1 Hz</u>               | BL mean                 | 5.7    | 9.3    | 8.2    | 9.4    | 10.4   | 12.4   | 4.8    | 9.9   |
|                             | BL SEM                  | 2.2    | 2.4    | 2.6    | 3.1    | 3.3    | 3.9    | 2.0    | 2.9   |
|                             | KD mean                 | 5.6    | 5.5    | 5.4    | 5.7    | 5.5    | 5.4    | 4.0    | 4.3   |
|                             | KD SEM                  | 0.8    | 1.0    | 1.0    | 1.1    | 1.2    | 0.9    | 0.6    | 0.9   |
|                             | P value                 | 0.9563 | 0.1700 | 0.3521 | 0.3377 | 0.2210 | 0.1117 | 0.7677 | 0.084 |
| <u>0.5-1.75 Hz</u>          | BL mean                 | 11.6   | 10.7   | 10.4   | 11.8   | 10.9   | 11.2   | 10.3   | 10.9  |
|                             | BL SEM                  | 2.1    | 1.0    | 1.2    | 2.0    | 1.1    | 1.6    | 1.9    | 1.9   |
|                             | KD mean                 | 15.1   | 11.8   | 11.9   | 11.8   | 12.3   | 12.3   | 12.4   | 9.9   |
|                             | KD SEM                  | 1.2    | 0.7    | 1.0    | 0.8    | 1.2    | 1.1    | 0.5    | 0.6   |
|                             | P value                 | 0.0685 | 0.2678 | 0.3006 | 0.9955 | 0.3845 | 0.5263 | 0.3137 | 0.599 |
| <u>0.75-1.75 Hz</u><br>"δ1" | BL mean                 | 10.0   | 8.5    | 8.4    | 9.4    | 8.4    | 8.3    | 9.0    | 8.8   |
|                             | BL SEM                  | 1.7    | 0.9    | 1.0    | 1.5    | 0.7    | 1.0    | 1.5    | 1.4   |
|                             | KD mean                 | 13.4   | 10.2   | 10.3   | 10.1   | 10.6   | 10.6   | 11.2   | 8.5   |
|                             | KD SEM                  | 1.2    | 0.6    | 0.9    | 0.7    | 1.1    | 1.1    | 0.5    | 0.4   |
|                             | P value                 | 0.0125 | 0.0228 | 0.0367 | 0.5881 | 0.0432 | 0.0550 | 0.1337 | 0.823 |
| <u>1.5-4 Hz</u>             | BL mean                 | 31.4   | 21.8   | 23.3   | 24.5   | 20.6   | 20.1   | 29.9   | 20.3  |
|                             | BL SEM                  | 4.6    | 2.8    | 3.4    | 3.6    | 2.5    | 2.7    | 4.4    | 2.5   |
|                             | KD mean                 | 43.0   | 30.5   | 31.0   | 29.7   | 31.7   | 32.7   | 37.7   | 25.7  |
|                             | KD SEM                  | 4.2    | 2.6    | 3.0    | 2.7    | 3.6    | 3.6    | 2.6    | 1.6   |
|                             | P value                 | 0.0035 | 0.0178 | 0.0168 | 0.0388 | 0.0138 | 0.0044 | 0.0395 | 0.020 |
| <u>2-4.5 Hz</u>             | BL mean                 | 31.2   | 21.4   | 22.9   | 24.1   | 20.3   | 19.7   | 30.0   | 20.1  |
|                             | BL SEM                  | 4.3    | 2.8    | 3.3    | 3.5    | 2.6    | 2.7    | 4.2    | 2.4   |
|                             | KD mean                 | 42.0   | 29.7   | 30.2   | 29.0   | 30.8   | 32.0   | 37.6   | 25.5  |
|                             | KD SEM                  | 3.8    | 2.4    | 2.7    | 2.5    | 3.3    | 3.3    | 2.4    | 1.6   |
|                             | P value                 | 0.0073 | 0.0301 | 0.0263 | 0.0607 | 0.0192 | 0.0045 | 0.0507 | 0.023 |
| <u>2.5-3.5 Hz</u><br>"δ2"   | BL mean                 | 13.2   | 9.0    | 9.6    | 10.1   | 8.4    | 8.2    | 12.5   | 8.2   |
|                             | BL SEM                  | 1.9    | 1.2    | 1.5    | 1.5    | 1.1    | 1.2    | 1.8    | 1.1   |
|                             | KD mean                 | 17.9   | 12.6   | 12.8   | 12.2   | 13.2   | 13.5   | 15.8   | 10.6  |
|                             | KD SEM                  | 1.7    | 1.1    | 1.2    | 1.1    | 1.5    | 1.4    | 1.1    | 0.7   |
|                             | P value                 | 0.0048 | 0.0259 | 0.0230 | 0.0557 | 0.0178 | 0.0045 | 0.044  | 0.023 |

Supplementary Table 1. Comparison of power in delta and slow waves with diverse defining band-widths. α3 KD increased the power in various delta bands but not in slow wave bands. P values are from two-tailed paired t-tests. Significant p-values reported in red. Hommel corrected p values for the 1.5-4 Hz band are given in Extended Data Fig 1.

| N | Area (pixels)                             |        |      |                                             |        |      |          | Cells (N)                                  |     |      |                                            |     |      |          |
|---|-------------------------------------------|--------|------|---------------------------------------------|--------|------|----------|--------------------------------------------|-----|------|--------------------------------------------|-----|------|----------|
|   | Anterior to injection site (AP-0.6-0.7mm) |        |      | Posterior to injection site (AP -0.7-0.9mm) |        |      | % (mean) | Anterior to injection site (AP -0.6-0.7mm) |     |      | Posterior to injection site (AP-0.7-0.9mm) |     |      | % (mean) |
|   | Green                                     | Red    | %    | Green                                       | Red    | %    |          | Green                                      | Red | %    | Green                                      | Red | %    |          |
| 1 | 127485                                    | 123800 | 97.1 | 185060                                      | 179433 | 97.0 | 97.0     | 248                                        | 247 | 99.6 | 313                                        | 308 | 98.4 | 99.0     |
| 2 | 340910                                    | 305723 | 89.7 | 332366                                      | 312618 | 94.1 | 91.9     | 374                                        | 324 | 86.6 | 171                                        | 144 | 84.2 | 85.4     |
| 3 | 75462                                     | 63648  | 84.3 | 168074                                      | 164505 | 97.9 | 91.1     | 146                                        | 136 | 93.2 | 199                                        | 179 | 89.9 | 91.6     |
| 4 | 585220                                    | 565528 | 96.6 | 408257                                      | 375366 | 91.9 | 94.3     | 631                                        | 618 | 97.9 | 330                                        | 305 | 92.4 | 95.2     |
| 5 | 566760                                    | 546778 | 96.5 | 471721                                      | 459172 | 97.3 | 96.9     | 585                                        | 565 | 96.6 | 346                                        | 340 | 98.3 | 97.4     |
| 6 | 355778                                    | 340242 | 95.6 | 617168                                      | 584501 | 94.7 | 95.2     | 323                                        | 301 | 93.2 | 622                                        | 596 | 95.8 | 94.5     |

110

Supplementary Table 2. Quantification of viral transduction confirmed high efficiency.  $\alpha$ 3KD percentage areas (pixels) and cells (N) measuring transduction efficiency within target neurons of the TRN as measured by mCherry+ (Red) within the GFP+ (Green) TRN region over total GFP+ TRN region.

115

Off target labelling

TC relay (Medial spread)

Globus Pallidus (Lateral spread)

| Mouse | mCherry+<br>cells (N) | mCherry+GFP+<br>cells<br>(N) | %    | mCherry+<br>cells (N) | mCherry+GFP+<br>cells<br>(N) | %   |
|-------|-----------------------|------------------------------|------|-----------------------|------------------------------|-----|
| 1     | 555                   | 16                           | 2.9  | 179                   | 0                            | 0.0 |
| 2     | 96                    | 0                            | 0.0  | 128                   | 11                           | 8.6 |
| 3     | 0                     | 0                            | N/A  | 0                     | 0                            | N/A |
| 4     | 744                   | 94                           | 12.6 | 193                   | 3                            | 1.6 |
| 5     | 362                   | 29                           | 8.0  | 314                   | 16                           | 5.1 |
| 6     | 495                   | 7                            | 1.4  | 438                   | 18                           | 4.1 |
| Mean  |                       |                              | 5.0  |                       |                              | 3.9 |
| SD    |                       |                              | 5.2  |                       |                              | 3.3 |

Supplementary Table 3. Quantification of viral transduction outside the TRN revealed low levels of off-target medial and lateral labeling restricted to areas devoid of  $\alpha 3$  subunits i.e. TC relay nuclei and globus pallidus.
